# Supplementary material
Source: HighWire-hosted journal article supplement (https://jnis.bmj.com/content/11/11/1145)
Supplement: inline-supplementary-material-1 [file inline-supplementary-material-1.docx]

**SUPPLEMENTARY FILE 1**

**STRIP Data Abstraction Form**

Site-Subject Number: ­­_________________

Date of Procedure: ____________________________

Did the patient receive IV-rtPA? Y N

Did the patient receive IA-rtPA? Y N

Final TICI Score: 0 1 2a 2b 2c 3

How many passes to achieve final TICI Score? ______________________________________

List Thrombectomy Devices Used: _________________________________________________ ____________________________________________________________________________________________________________________________________________________________

Which device retrieved the most clot: ____________________________

Was the affected vessel Hyperdense on CT? Y N

Mean Clot HU (if available): _______ Max Clot HU (if available):_________

Location of Occlusion: ICA ICA Terminus M1 M2 A1 A2 Vertebral Basilar P1

Stroke Aetiology: Large Artery Atherosclerosis Cardioembolic Unknown Other
Specify if Other: ________________________________

__________________________________

PI Signature

_________________________________

Date

**SUPPLEMENTARY FILE 2**

H&E Staining procedure:

Deparaffinise and hydrate sections to distilled water:

Dry sections in oven 60 degrees C for at least 30 minutes (H&E) or 2 hours (IHC)

1. Xylene I – 10 min
2. Xylene II  – 10 min
3. 100% alcohol – 5 min
4. 100% alcohol – 5 min
5. 95 % alcohol I – 5 min
6. 95% alcohol II – 5 min
7. 70% alcohol   – 2 min
8. Wash slides in running tap water – 5 min

**Staining:**

1. Stain sections in Hematoxylin (Sigma #GHS332-1L) – 5 min
2. Rinse sections in running tap water – 5 min
3. Dip sections in 1% Acid Alcohol – 2 quick dips
4. Wash sections well in running tap water until sections are blue – 5 minutes
5. Dip sections in Bluing Reagent (Thermo Ref 7301) – 1 minute
6. Rinse sections in hot running water – 5 minutes
7. 95% alcohol – 10 quick dips
8. Stain in Eosin – 45 seconds

**Dehydrate and Clear:**

1. 95% alcohol I 10 quick dips
2. 95% alcohol II 10 quick dips
3. 100% alcohol I 10 quick dips
4. 100% alcohol II 10 quick dips
5. Xylene I – 5 min
6. Xylene II – 5 min

Dry sections at RT completely, mount sections with mounting medium.

**SUPPLEMENTARY FILE 3**

Martius Scarlett Blue Staining Protocol:

Deparaffinise and hydrate sections to distilled water:

Dry sections in oven 60 degrees F for at least 30 minutes (H&E) or 2 hours (IHC)

1. Xylene I – 10 min
2. Xylene II  – 10 min
3. 100% alcohol – 5 min
4. 100% alcohol – 5 min
5. 95 % alcohol I – 5 min
6. 95% alcohol II – 5 min
7. 80% alcohol  – 1-2 min
8. Wash slides in running tap water – 5 min

Staining:

1. Place into Bouin's fluid at 56°C in a water bath. 1 hour
2. Rinse well in distilled water/running water. 5 mins
3. Place into the iron alum-celestine blue solution 10 minutes.
4. Wash with running tap water 5 min.
5. Place into the Mayer’s hematoxylin 10 minutes.
6. Wash with Warm water to blue. 5 mins
7. Rinse with 95% ethanol. 1 min
8. Place in Martius yellow 5 mins.
9. Rinse with distilled water. 1 min
10. Place in crystal scarlet 10 minutes.
11. Differentiate with phosphotungstic acid until only fibrin is red (***up to*** 10 minutes).
12. Place in methyl blue until collagen is blue 10 minutes
13. Rinse briefly with 1% aqueous acetic acid. 1 min
14. Dehydrate rapidly 95% and 100% Alcohol 2 quick dips in each
15. Clear with xylene
16. Mount with a resinous medium.
